# Supplementary material for: Clustered Emergency Room Visits Following an Acute Heart Failure Admission: A Population‐Based Study
Source: PubMed Central journal article supplement — J Am Heart Assoc. 2018 Mar 27;7(7):e007569. doi: 10.1161/JAHA.117.007569 (PMC5907582; doi:10.1161/jaha.117.007569), 2018-03-27

# **SUPPLEMENTAL MATERIAL**

**Table S1. Medications for individuals > 65 y.o. (within 6 months post-index hospitalization discharge).**

| <b>Drug</b>  | <b>Overall<br/>(n=58,481)</b> | <b>Non-Cluster<br/>(n=49,693)</b> | <b>Cluster<br/>(n=8,788)</b> | <b>p-value</b> |
|--------------|-------------------------------|-----------------------------------|------------------------------|----------------|
| ACEi / ARB   | 40,419 (69.1 %)               | 34,032 (68.5 %)                   | 6,387 (72.7 %)               | < 0.001        |
| Betablockers | 39,756 (68.0 %)               | 33,357 (67.1 %)                   | 6,399 (72.8 %)               | < 0.001        |
| MRA          | 4,811 (8.2 %)                 | 3,912 (7.9 %)                     | 899 (10.2 %)                 | < 0.001        |
| Diuretics    | 39,737 (67.9 %)               | 33,336 (67.1 %)                   | 6,401 (72.8 %)               | < 0.001        |
| Digitalis    | 8,422 (14.4 %)                | 7,025 (14.1 %)                    | 1,397 (15.9 %)               | < 0.001        |

ACEi / ARB: Angiotensin Converting Enzyme-inhibitor / Angiotensin II Receptor Blocker; MRA: Mineralocorticoid Receptor Antagonist.

Figure S1. Cohort timeframe definitions.

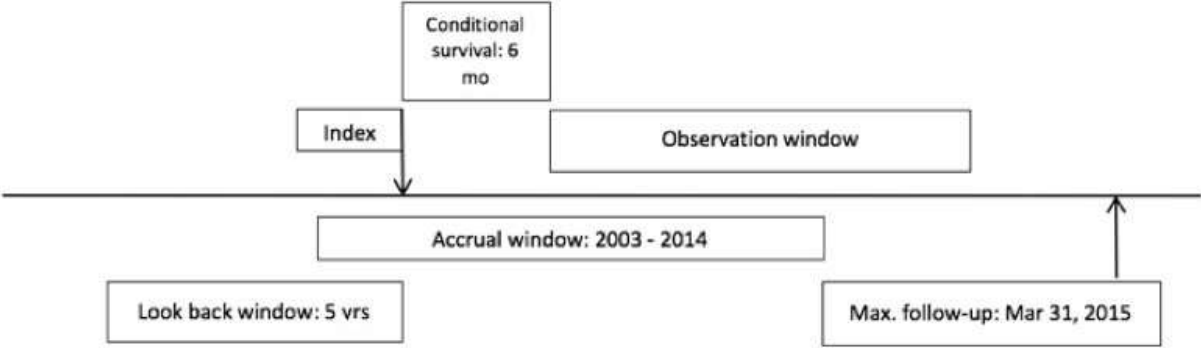

Supplement: JAH3-7-e007569-s001.pdf [file JAH3-7-e007569-s001.pdf]
